# Supplementary material
Source: PubMed Central journal article supplement (PMC4075356)
Supplement: supp_127.13.2840_JCS139246.pdf [file supp_127.13.2840_JCS139246.pdf]

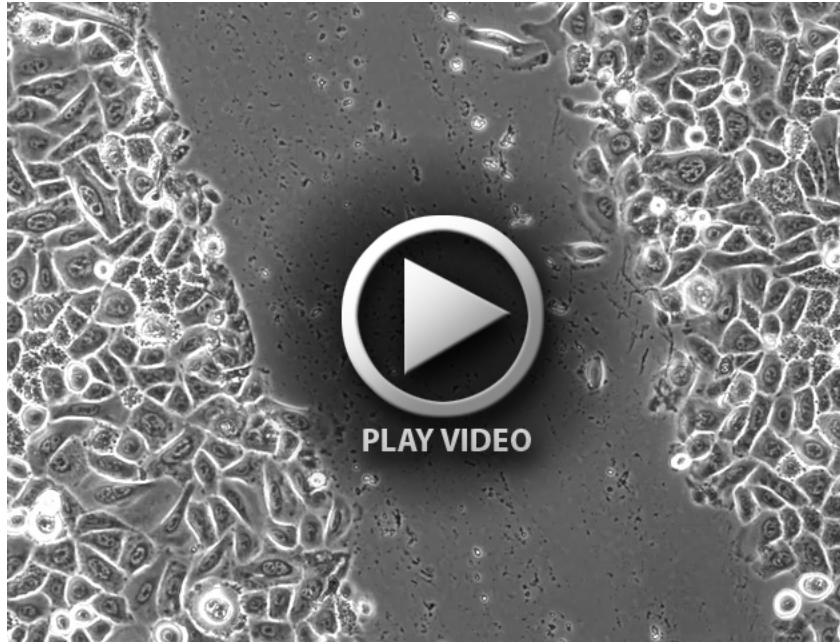

Movie 1: Wild type keratinocytes closing a scratch. Images were recorded every 10 min, and movie generated using quicktime.

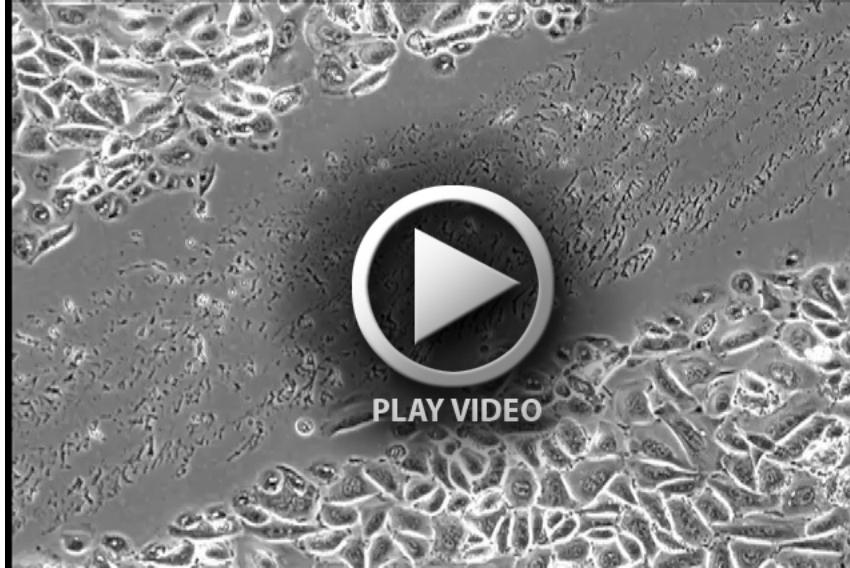

Movie 2: lrf6-deficient keratinocytes closing a scratch. Images were recorded every 10 min, and movie generated using quicktime.
